# Supplementary material for: The Potential Role of an Aberrant Mucosal Immune Response to SARS-CoV-2 in the Pathogenesis of IgA Nephropathy
Source: MDPI journal article supplement (doi:10.3390/pathogens10070881), 2021-07-12
Supplement: s1 [file s1]

## Supplementary Materials

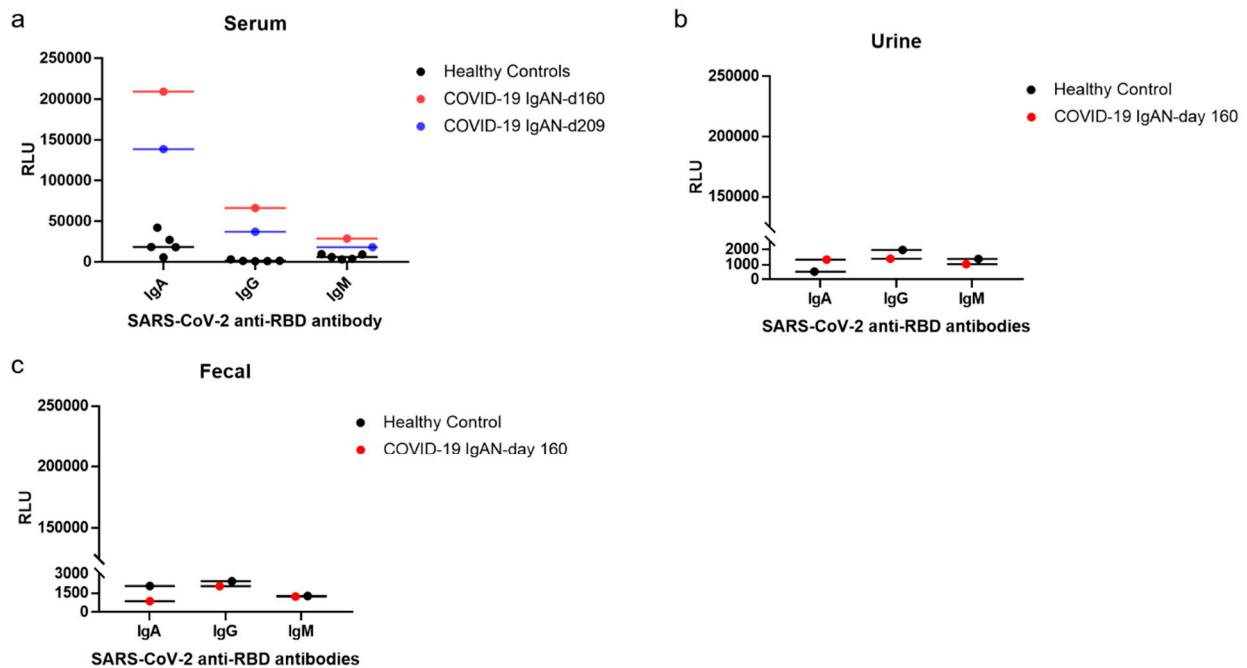

**Figure S1.** anti-SARS-CoV-2 spike protein RBD IgA, IgG, and IgM antibody concentrations in the serum, urine, and feces. **a.** IgA antibody levels remained high, even at seven months post-infection (anti-spike protein RBD IgA RLU:  $138475 \pm 26834$ ; anti-spike protein RBD IgM RLU:  $18084 \pm 967$ ; anti-spike protein RBD IgG RLU:  $36991 \pm 7665$ ). **b & c.** no increase in anti-SARS-CoV-2 spike protein RBD IgA, IgG, or IgM antibodies was observed in the urine or fecal samples of this COVID-19 IgAN case.
